# Supplementary material
Source: publisher site journal article supplement (https://www.dovepress.com/article/334756)
Supplement: Supplementary file 1 [file get_supplementary_file.php]

**Supplementary Tables 1:** The list of 307 ARGs downloaded from the Human Aging Genomic Resources 3.

| **Symbol** | **Gene name** |
| --- | --- |
| GHR | growth hormone receptor |
| GHRH | growth hormone releasing hormone |
| SHC1 | SHC (Src homology 2 domain containing) transforming protein 1 |
| POU1F1 | POU class 1 homeobox 1 |
| PROP1 | PROP paired-like homeobox 1 |
| TP53 | tumor protein p53 |
| TERC | telomerase RNA component |
| TERT | telomerase reverse transcriptase |
| ATM | ATM serine/threonine kinase |
| PLAU | plasminogen activator, urokinase |
| ERCC2 | excision repair cross-complementation group 2 |
| ERCC8 | excision repair cross-complementation group 8 |
| WRN | Werner syndrome, RecQ helicase-like |
| LMNA | lamin A/C |
| IGF1R | insulin-like growth factor 1 receptor |
| TXN | thioredoxin |
| KL | klotho |
| E2F1 | E2F transcription factor 1 |
| PTPN11 | protein tyrosine phosphatase, non-receptor type 11 |
| NFKB2 | nuclear factor of kappa light polypeptide gene enhancer in B-cells 2 (p49/p100) |
| STAT5B | signal transducer and activator of transcription 5B |
| STAT3 | signal transducer and activator of transcription 3 (acute-phase response factor) |
| STAT5A | signal transducer and activator of transcription 5A |
| NRG1 | neuregulin 1 |
| HDAC3 | histone deacetylase 3 |
| GH1 | growth hormone 1 |
| IL7R | interleukin 7 receptor |
| IGF1 | insulin-like growth factor 1 (somatomedin C) |
| IGF2 | insulin-like growth factor 2 |
| INS | insulin |
| NGF | nerve growth factor (beta polypeptide) |
| IRS1 | insulin receptor substrate 1 |
| PTPN1 | protein tyrosine phosphatase, non-receptor type 1 |
| IRS2 | insulin receptor substrate 2 |
| AKT1 | v-akt murine thymoma viral oncogene homolog 1 |
| PIK3CB | phosphatidylinositol-4,5-bisphosphate 3-kinase, catalytic subunit beta |
| NGFR | nerve growth factor receptor |
| HRAS | Harvey rat sarcoma viral oncogene homolog |
| MYC | v-myc avian myelocytomatosis viral oncogene homolog |
| EGFR | epidermal growth factor receptor |
| ERBB2 | erb-b2 receptor tyrosine kinase 2 |
| INSR | insulin receptor |
| NCOR1 | nuclear receptor corepressor 1 |
| NBN | nibrin |
| JUND | jun D proto-oncogene |
| IL2 | interleukin 2 |
| PDGFB | platelet-derived growth factor beta polypeptide |
| EGF | epidermal growth factor |
| IL2RG | interleukin 2 receptor, gamma |
| FOS | FBJ murine osteosarcoma viral oncogene homolog |
| PDGFRB | platelet-derived growth factor receptor, beta polypeptide |
| EPOR | Erythropoietin receptor |
| SST | somatostatin |
| PRKCD | protein kinase C, delta |
| PPARA | peroxisome proliferator-activated receptor alpha |
| RET | ret proto-oncogene |
| PLCG2 | phospholipase C, gamma 2 (phosphatidylinositol-specific) |
| PEX5 | peroxisomal biogenesis factor 5 |
| TCF3 | transcription factor 3 |
| PARP1 | poly (ADP-ribose) polymerase 1 |
| BRCA1 | breast cancer 1, early onset |
| PIN1 | peptidylprolyl cis/trans isomerase, NIMA-interacting 1 |
| PTEN | phosphatase and tensin homolog |
| CREBBP | CREB binding protein |
| HIF1A | hypoxia inducible factor 1, alpha subunit (basic helix-loop-helix transcription factor) |
| UBB | ubiquitin B |
| RPA1 | replication protein A1, 70kDa |
| BLM | Bloom syndrome, RecQ helicase-like |
| BCL2 | B-cell CLL/lymphoma 2 |
| S100B | S100 calcium binding protein B |
| VCP | valosin containing protein |
| POLG | polymerase (DNA directed), gamma |
| IGFBP3 | insulin-like growth factor binding protein 3 |
| HSP90AA1 | heat shock protein 90kDa alpha (cytosolic), class A member 1 |
| NR3C1 | nuclear receptor subfamily 3, group C, member 1 (glucocorticoid receptor) |
| EGR1 | early growth response 1 |
| VEGFA | vascular endothelial growth factor A |
| ABL1 | ABL proto-oncogene 1, non-receptor tyrosine kinase |
| BRCA2 | breast cancer 2, early onset |
| TOP2A | topoisomerase (DNA) II alpha |
| TOP2B | topoisomerase (DNA) II beta |
| NFKB1 | nuclear factor of kappa light polypeptide gene enhancer in B-cells 1 |
| TOP1 | topoisomerase (DNA) I |
| RAD51 | RAD51 recombinase |
| UBE2I | ubiquitin-conjugating enzyme E2I |
| TNF | tumor necrosis factor |
| PDPK1 | 3-phosphoinositide dependent protein kinase 1 |
| CEBPA | CCAAT/enhancer binding protein (C/EBP), alpha |
| CEBPB | CCAAT/enhancer binding protein (C/EBP), beta |
| MXI1 | MAX interactor 1, dimerization protein |
| TGFB1 | transforming growth factor, beta 1 |
| ERCC6 | excision repair cross-complementation group 6 |
| STK11 | serine/threonine kinase 11 |
| EP300 | E1A binding protein p300 |
| APTX | aprataxin |
| PML | promyelocytic leukemia |
| GSK3B | glycogen synthase kinase 3 beta |
| HTT | huntingtin |
| PRKCA | protein kinase C, alpha |
| SSTR3 | somatostatin receptor 3 |
| HELLS | helicase, lymphoid-specific |
| APOC3 | apolipoprotein C-III |
| EEF2 | eukaryotic translation elongation factor 2 |
| ERCC3 | excision repair cross-complementation group 3 |
| TERF1 | telomeric repeat binding factor (NIMA-interacting) 1 |
| PRKDC | protein kinase, DNA-activated, catalytic polypeptide |
| CAT | catalase |
| ERCC5 | excision repair cross-complementation group 5 |
| AR | androgen receptor |
| GTF2H2 | general transcription factor IIH, polypeptide 2, 44kDa |
| XRCC5 | X-ray repair complementing defective repair in Chinese hamster cells 5 (double-strand-break rejoining) |
| PCNA | proliferating cell nuclear antigen |
| FEN1 | flap structure-specific endonuclease 1 |
| FAS | Fas cell surface death receptor |
| TERF2 | telomeric repeat binding factor 2 |
| XRCC6 | X-ray repair complementing defective repair in Chinese hamster cells 6 |
| POLD1 | polymerase (DNA directed), delta 1, catalytic subunit |
| BAX | BCL2-associated X protein |
| RB1 | retinoblastoma 1 |
| EMD | emerin |
| GRB2 | growth factor receptor-bound protein 2 |
| FOXO3 | forkhead box O3 |
| FOXO1 | forkhead box O1 |
| HSF1 | heat shock transcription factor 1 |
| XPA | xeroderma pigmentosum, complementation group A |
| MSRA | methionine sulfoxide reductase A |
| RECQL4 | RecQ helicase-like 4 |
| SOD2 | superoxide dismutase 2, mitochondrial |
| SOD1 | superoxide dismutase 1, soluble |
| FOXM1 | forkhead box M1 |
| COQ7 | coenzyme Q7 homolog, ubiquinone (yeast) |
| CACNA1A | calcium channel, voltage-dependent, P/Q type, alpha 1A subunit |
| LRP2 | low density lipoprotein receptor-related protein 2 |
| AIFM1 | apoptosis-inducing factor, mitochondrion-associated, 1 |
| UCHL1 | ubiquitin carboxyl-terminal esterase L1 (ubiquitin thiolesterase) |
| APP | amyloid beta (A4) precursor protein |
| APOE | apolipoprotein E |
| A2M | alpha-2-macroglobulin |
| SNCG | synuclein, gamma (breast cancer-specific protein 1) |
| PRDX1 | peroxiredoxin 1 |
| PON1 | paraoxonase 1 |
| RELA | v-rel avian reticuloendotheliosis viral oncogene homolog A |
| IL6 | interleukin 6 |
| RGN | regucalcin |
| ATP5O | ATP synthase, H+ transporting, mitochondrial F1 complex, O subunit |
| RAD52 | RAD52 homolog, DNA repair protein |
| TOP3B | topoisomerase (DNA) III beta |
| ERCC1 | excision repair cross-complementation group 1 |
| SIRT1 | sirtuin 1 |
| HDAC1 | histone deacetylase 1 |
| HSPA9 | heat shock 70kDa protein 9 (mortalin) |
| GPX1 | glutathione peroxidase 1 |
| GSR | glutathione reductase |
| GSS | glutathione synthetase |
| GSTA4 | glutathione S-transferase alpha 4 |
| GSTP1 | glutathione S-transferase pi 1 |
| MT-CO1 | mitochondrially encoded cytochrome c oxidase I |
| HSPD1 | heat shock 60kDa protein 1 (chaperonin) |
| HSPA1A | heat shock 70kDa protein 1A |
| HSPA1B | heat shock 70kDa protein 1B |
| PCMT1 | protein-L-isoaspartate (D-aspartate) O-methyltransferase |
| MAPK8 | mitogen-activated protein kinase 8 |
| YWHAZ | tyrosine 3-monooxygenase/tryptophan 5-monooxygenase activation protein, zeta |
| PTK2B | protein tyrosine kinase 2 beta |
| PTK2 | protein tyrosine kinase 2 |
| IL7 | interleukin 7 |
| MAPK14 | mitogen-activated protein kinase 14 |
| FGFR1 | fibroblast growth factor receptor 1 |
| SP1 | Sp1 transcription factor |
| FLT1 | fms-related tyrosine kinase 1 |
| JUN | jun proto-oncogene |
| MED1 | mediator complex subunit 1 |
| MAPK9 | mitogen-activated protein kinase 9 |
| MAPK3 | mitogen-activated protein kinase 3 |
| HMGB1 | high mobility group box 1 |
| CCNA2 | cyclin A2 |
| HMGB2 | high mobility group box 2 |
| MAP3K5 | mitogen-activated protein kinase kinase kinase 5 |
| TAF1 | TAF1 RNA polymerase II, TATA box binding protein (TBP)-associated factor, 250kDa |
| LMNB1 | lamin B1 |
| SDHC | succinate dehydrogenase complex, subunit C, integral membrane protein, 15kDa |
| FOXO4 | forkhead box O4 |
| HESX1 | HESX homeobox 1 |
| PIK3R1 | phosphoinositide-3-kinase, regulatory subunit 1 (alpha) |
| BSCL2 | Berardinelli-Seip congenital lipodystrophy 2 (seipin) |
| AGPAT2 | 1-acylglycerol-3-phosphate O-acyltransferase 2 |
| BMI1 | BMI1 proto-oncogene, polycomb ring finger |
| EEF1A1 | eukaryotic translation elongation factor 1 alpha 1 |
| TFAP2A | transcription factor AP-2 alpha (activating enhancer binding protein 2 alpha) |
| BDNF | brain-derived neurotrophic factor |
| CREB1 | cAMP responsive element binding protein 1 |
| ATF2 | activating transcription factor 2 |
| TBP | TATA box binding protein |
| APEX1 | APEX nuclease (multifunctional DNA repair enzyme) 1 |
| HBP1 | HMG-box transcription factor 1 |
| BUB1B | BUB1 mitotic checkpoint serine/threonine kinase B |
| PTGS2 | prostaglandin-endoperoxide synthase 2 (prostaglandin G/H synthase and cyclooxygenase) |
| HSPA8 | heat shock 70kDa protein 8 |
| SIN3A | SIN3 transcription regulator family member A |
| CDK1 | cyclin-dependent kinase 1 |
| TFDP1 | transcription factor Dp-1 |
| DDIT3 | DNA-damage-inducible transcript 3 |
| POLA1 | polymerase (DNA directed), alpha 1, catalytic subunit |
| MAPT | microtubule-associated protein tau |
| CTGF | connective tissue growth factor |
| HDAC2 | histone deacetylase 2 |
| MAX | MYC associated factor X |
| MXD1 | MAX dimerization protein 1 |
| MDM2 | MDM2 proto-oncogene, E3 ubiquitin protein ligase |
| SUMO1 | small ubiquitin-like modifier 1 |
| H2AFX | H2A histone family, member X |
| HOXB7 | homeobox B7 |
| HOXC4 | homeobox C4 |
| JAK2 | Janus kinase 2 |
| ESR1 | estrogen receptor 1 |
| LEP | leptin |
| LEPR | leptin receptor |
| NFKBIA | nuclear factor of kappa light polypeptide gene enhancer in B-cells inhibitor, alpha |
| CLU | clusterin |
| MTOR | mechanistic target of rapamycin (serine/threonine kinase) |
| GHRHR | growth hormone releasing hormone receptor |
| CTNNB1 | catenin (cadherin-associated protein), beta 1, 88kDa |
| PSEN1 | presenilin 1 |
| DLL3 | delta-like 3 (Drosophila) |
| CDKN2A | cyclin-dependent kinase inhibitor 2A |
| PPP1CA | protein phosphatase 1, catalytic subunit, alpha isozyme |
| DBN1 | drebrin 1 |
| NOG | noggin |
| ELN | elastin |
| ATR | ATR serine/threonine kinase |
| UCP3 | uncoupling protein 3 (mitochondrial, proton carrier) |
| ZMPSTE24 | zinc metallopeptidase STE24 |
| TP63 | tumor protein p63 |
| UCP2 | uncoupling protein 2 (mitochondrial, proton carrier) |
| POLB | polymerase (DNA directed), beta |
| GCLC | glutamate-cysteine ligase, catalytic subunit |
| GCLM | glutamate-cysteine ligase, modifier subunit |
| SIRT6 | sirtuin 6 |
| BUB3 | BUB3 mitotic checkpoint protein |
| RAE1 | ribonucleic acid export 1 |
| PMCH | pro-melanin-concentrating hormone |
| MLH1 | mutL homolog 1 |
| CSNK1E | casein kinase 1, epsilon |
| STUB1 | STIP1 homology and U-box containing protein 1, E3 ubiquitin protein ligase |
| PPM1D | protein phosphatase, Mg2+/Mn2+ dependent, 1D |
| CHEK2 | checkpoint kinase 2 |
| PCK1 | phosphoenolpyruvate carboxykinase 1 (soluble) |
| ARHGAP1 | Rho GTPase activating protein 1 |
| CDC42 | cell division cycle 42 |
| ARNTL | aryl hydrocarbon receptor nuclear translocator-like |
| CLOCK | clock circadian regulator |
| HIC1 | hypermethylated in cancer 1 |
| PAPPA | pregnancy-associated plasma protein A, pappalysin 1 |
| ADCY5 | adenylate cyclase 5 |
| PPARGC1A | peroxisome proliferator-activated receptor gamma, coactivator 1 alpha |
| GPX4 | glutathione peroxidase 4 |
| UCP1 | uncoupling protein 1 (mitochondrial, proton carrier) |
| FGF23 | fibroblast growth factor 23 |
| EFEMP1 | EGF containing fibulin-like extracellular matrix protein 1 |
| ERCC4 | excision repair cross-complementation group 4 |
| CETP | cholesteryl ester transfer protein, plasma |
| PPARG | peroxisome proliferator-activated receptor gamma |
| AGTR1 | angiotensin II receptor, type 1 |
| CISD2 | CDGSH iron sulfur domain 2 |
| EEF1E1 | eukaryotic translation elongation factor 1 epsilon 1 |
| EPS8 | epidermal growth factor receptor pathway substrate 8 |
| KCNA3 | potassium channel, voltage gated shaker related subfamily A, member 3 |
| SIRT7 | sirtuin 7 |
| SLC13A1 | solute carrier family 13 (sodium/sulfate symporter), member 1 |
| SOCS2 | suppressor of cytokine signaling 2 |
| TPP2 | tripeptidyl peptidase II |
| TP53BP1 | tumor protein p53 binding protein 1 |
| SIRT3 | sirtuin 3 |
| NCOR2 | nuclear receptor corepressor 2 |
| SUN1 | Sad1 and UNC84 domain containing 1 |
| BAK1 | BCL2-antagonist/killer 1 |
| IGFBP2 | insulin-like growth factor binding protein 2, 36kDa |
| PYCR1 | pyrroline-5-carboxylate reductase 1 |
| TP73 | tumor protein p73 |
| CNR1 | cannabinoid receptor 1 (brain) |
| NFE2L2 | nuclear factor, erythroid 2-like 2 |
| CDKN1A | cyclin-dependent kinase inhibitor 1A (p21, Cip1) |
| PDGFRA | platelet-derived growth factor receptor, alpha polypeptide |
| PIK3CA | phosphatidylinositol-4,5-bisphosphate 3-kinase, catalytic subunit alpha |
| C1QA | complement component 1, q subcomponent, A chain |
| CDKN2B | cyclin-dependent kinase inhibitor 2B (p15, inhibits CDK4) |
| EIF5A2 | eukaryotic translation initiation factor 5A2 |
| MIF | macrophage migration inhibitory factor (glycosylation-inhibiting factor) |
| DGAT1 | diacylglycerol O-acyltransferase 1 |
| MT1E | metallothionein 1E |
| FGF21 | fibroblast growth factor 21 |
| HTRA2 | HtrA serine peptidase 2 |
| GSK3A | glycogen synthase kinase 3 alpha |
| NUDT1 | nudix (nucleoside diphosphate linked moiety X)-type motif 1 |
| IKBKB | inhibitor of kappa light polypeptide gene enhancer in B-cells, kinase beta |
| SQSTM1 | sequestosome 1 |
| CDK7 | cyclin-dependent kinase 7 |
| GRN | granulin |
| SERPINE1 | serpin peptidase inhibitor, clade E (nexin, plasminogen activator inhibitor type 1), member 1 |
| SPRTN | SprT-like N-terminal domain |
| RICTOR | RPTOR independent companion of MTOR, complex 2 |
| CTF1 | cardiotrophin 1 |
| TRAP1 | TNF receptor-associated protein 1 |
| TRPV1 | transient receptor potential cation channel subfamily V member 1 |
| NFE2L1 | nuclear factor, erythroid 2-like 1 |
| IFNB1 | Interferon beta |
| GDF11 | growth differentiation factor 11 |

**Supplementary Tables 2:** The candidateARGs associated with OS in patients with BC in training TCGA datasets.

| **ID** | **HR** | **HR.95L** | **HR.95H** | **P value** |
| --- | --- | --- | --- | --- |
| AIFM1 | 1.000112063 | 1.00003002 | 1.000194113 | 0.007424957 |
| BRCA2 | 1.000231596 | 1.000006413 | 1.000456829 | 0.043822015 |
| CLOCK | 1.000101595 | 1.000035259 | 1.000167935 | 0.002683919 |
| CLU | 1.000000687 | 1.000000017 | 1.000001356 | 0.044408749 |
| DGAT1 | 1.000141145 | 1.000054845 | 1.000227452 | 0.001347621 |
| DLL3 | 1.000941478 | 1.000191374 | 1.001692145 | 0.01388423 |
| EPS8 | 1.000061123 | 1.000006161 | 1.000116089 | 0.029281993 |
| ERCC8 | 1.000793153 | 1.000041906 | 1.001544965 | 0.038514306 |
| GCLC | 1.000103253 | 1.000021748 | 1.000184765 | 0.013029209 |
| GRB2 | 1.000010682 | 1.000000294 | 1.000021069 | 0.043849974 |
| GSR | 1.000037141 | 1.000000539 | 1.000073744 | 0.046720861 |
| GSS | 1.00005948 | 1.00001043 | 1.000108532 | 0.017465324 |
| HSP90AA1 | 1.000003084 | 1.000001396 | 1.000004772 | 0.000343363 |
| HSPA9 | 1.00001924 | 1.00000737 | 1.00003111 | 0.00148873 |
| HSPD1 | 1.000007136 | 1.000000151 | 1.000014122 | 0.045264245 |
| IL2RG | 0.999890247 | 0.999797114 | 0.999983389 | 0.020916222 |
| MAP3K5 | 1.000134861 | 1.000010241 | 1.000259497 | 0.033917789 |
| MAPK9 | 1.000069812 | 1.000001359 | 1.000138271 | 0.0456226 |
| MXI1 | 1.000095118 | 1.000015775 | 1.000174467 | 0.018790726 |
| NFKB2 | 0.999886391 | 0.999791949 | 0.999980842 | 0.018398839 |
| NFKBIA | 0.999922379 | 0.999871012 | 0.999973747 | 0.003060603 |
| PCMT1 | 1.000085081 | 1.000036714 | 1.00013345 | 0.000565155 |
| PIK3CA | 1.000039916 | 1.000020217 | 1.000059616 | 7.14E-05 |
| PLAU | 1.000028034 | 1.000006421 | 1.000049649 | 0.011015708 |
| PRDX1 | 1.00001742 | 1.000004753 | 1.000030088 | 0.007031168 |
| PTK2 | 1.000036876 | 1.000010527 | 1.000063225 | 0.006087908 |
| RAD51 | 1.000282658 | 1.00000197 | 1.000563425 | 0.048413558 |
| RB1 | 1.00007994 | 1.00000725 | 1.000152636 | 0.031126906 |
| SDHC | 1.000041415 | 1.000000589 | 1.000082243 | 0.046785177 |
| SOD1 | 1.000021526 | 1.000002323 | 1.00004073 | 0.028016318 |
| TBP | 1.000398856 | 1.000035265 | 1.00076258 | 0.031547278 |
| TERF1 | 1.000151775 | 1.000010101 | 1.00029347 | 0.035754046 |
| YWHAZ | 1.000003331 | 1.000000511 | 1.00000615 | 0.020603531 |

**Supplementary Tables 3:** The candidateARGs associated with OS in patients with BC in validation GEO datasets.

| **ID** | **HR** | **HR.95L** | **HR.95H** | **P value** |
| --- | --- | --- | --- | --- |
| ABL1 | 3.689576967 | 1.91419086 | 7.111609651 | 9.65E-05 |
| AGPAT2 | 1.489720165 | 1.055898308 | 2.101780212 | 0.023226479 |
| BCL2 | 0.524160898 | 0.391344319 | 0.702053496 | 1.47E-05 |
| BRCA2 | 1.576442903 | 1.194749032 | 2.080078879 | 0.001291251 |
| BUB1B | 1.314713618 | 1.058965382 | 1.632227009 | 0.013173464 |
| BUB3 | 0.506896651 | 0.321001209 | 0.800446252 | 0.003558372 |
| CAT | 0.631385584 | 0.409334988 | 0.973891233 | 0.037561406 |
| CCNA2 | 1.281566603 | 1.025985913 | 1.600814337 | 0.028814312 |
| CDKN1A | 1.4511795 | 1.088924487 | 1.933946722 | 0.01104206 |
| CDKN2B | 1.23848449 | 1.00327574 | 1.528835765 | 0.04654717 |
| CEBPB | 1.570127666 | 1.102073845 | 2.236965245 | 0.012484521 |
| CSNK1E | 1.926173994 | 1.294771506 | 2.865483398 | 0.001217718 |
| DBN1 | 2.427326297 | 1.692981192 | 3.480199886 | 1.41E-06 |
| DDIT3 | 1.83174292 | 1.139993607 | 2.943246442 | 0.012368407 |
| E2F1 | 1.40567873 | 1.049524551 | 1.882693158 | 0.022359173 |

**
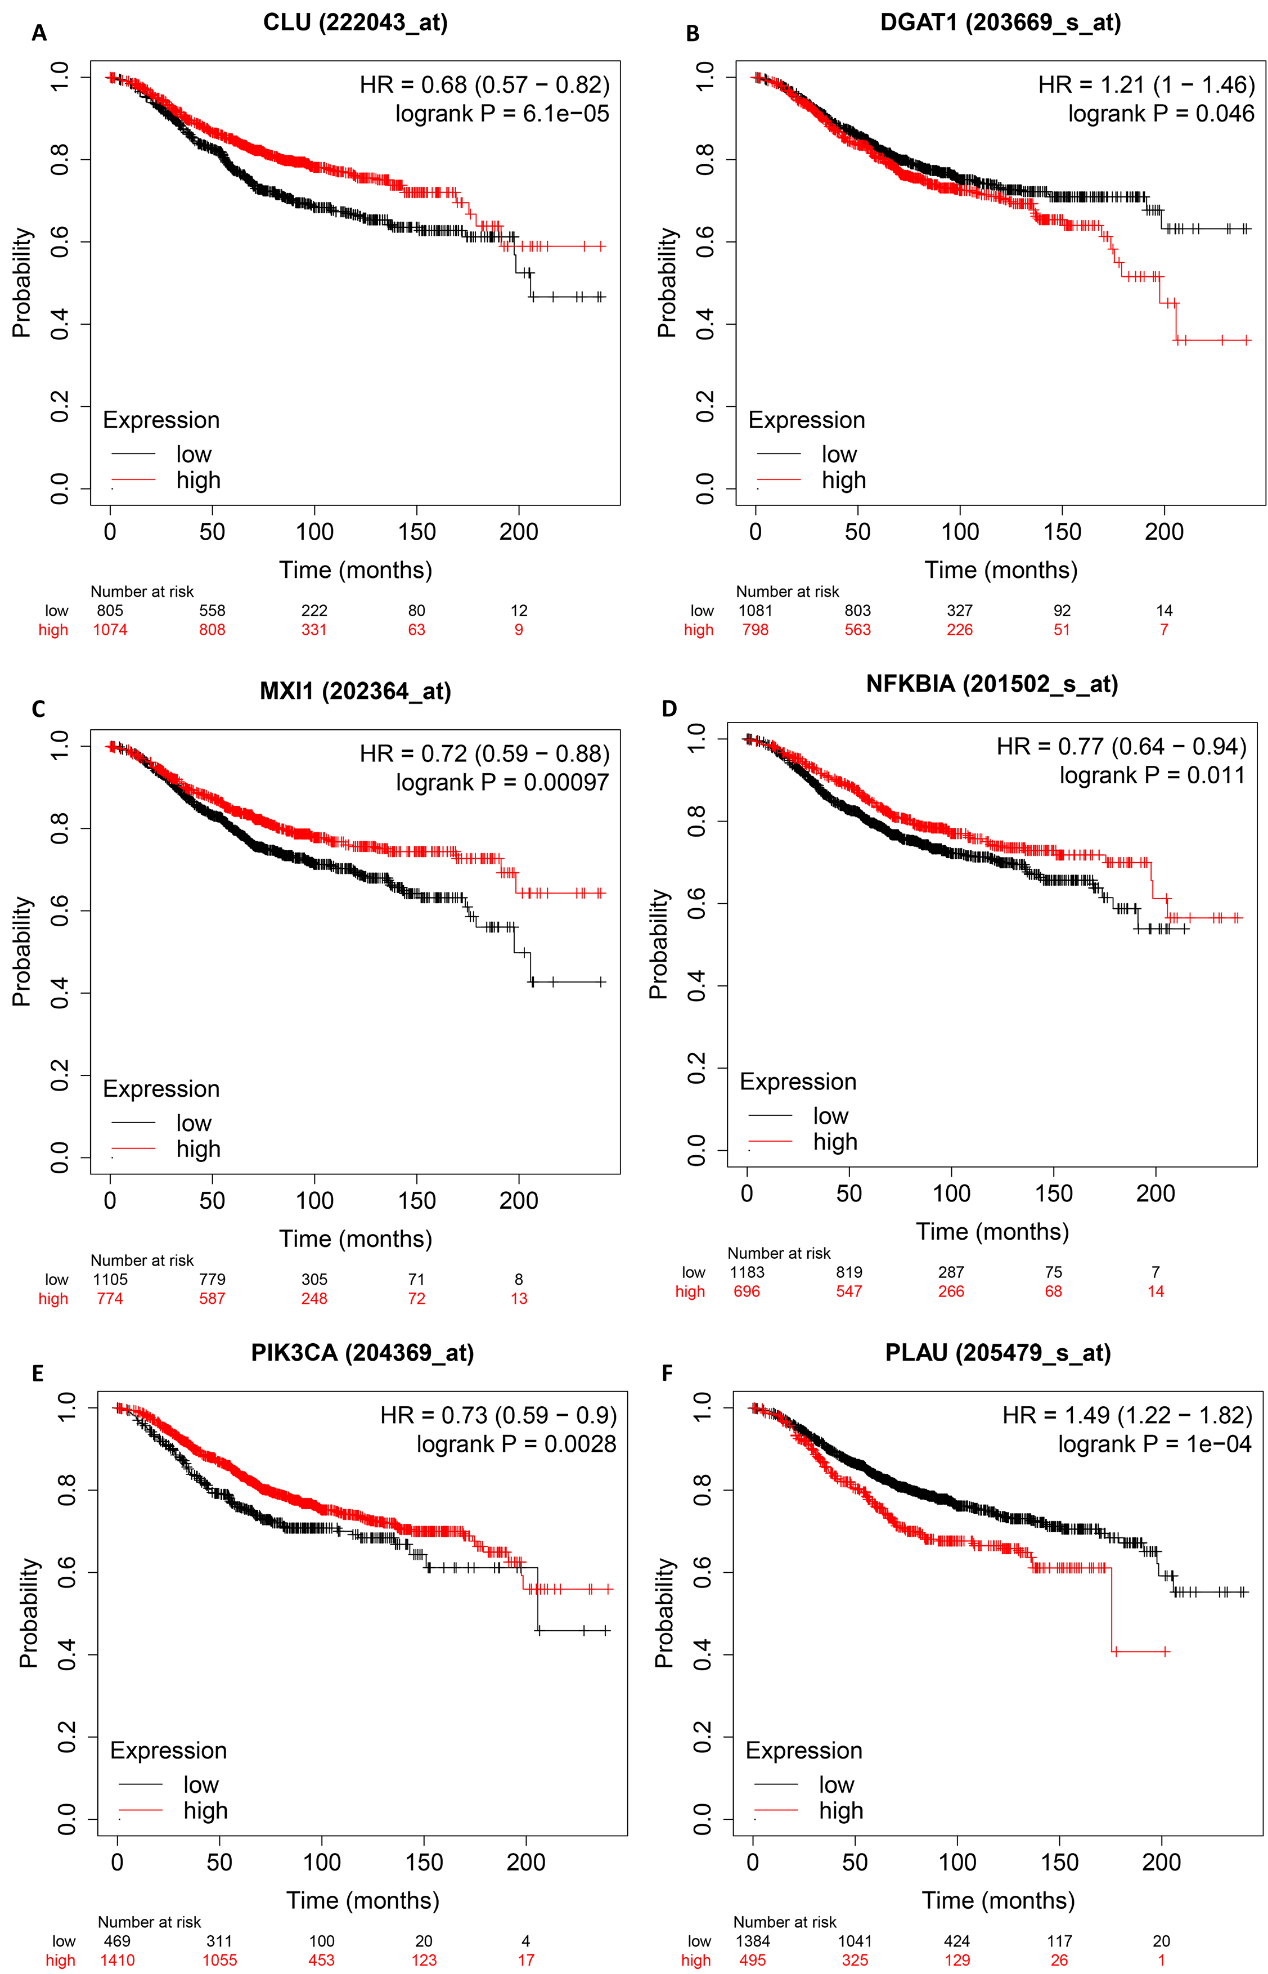
**

**Supplementary Figure 1:**

The OS curves of the six identified ARG drawn by the Kaplan-Meier plotter database

in all breast cancer patients. (A) The OS curves of CLU. (B) The OS curves of

DGAT1. (C) The OS curves of MXI1. (D) The OS curves of NFKBIA. (E) The OS

curves of PIK3CA. (F) The OS curves of PLAU.


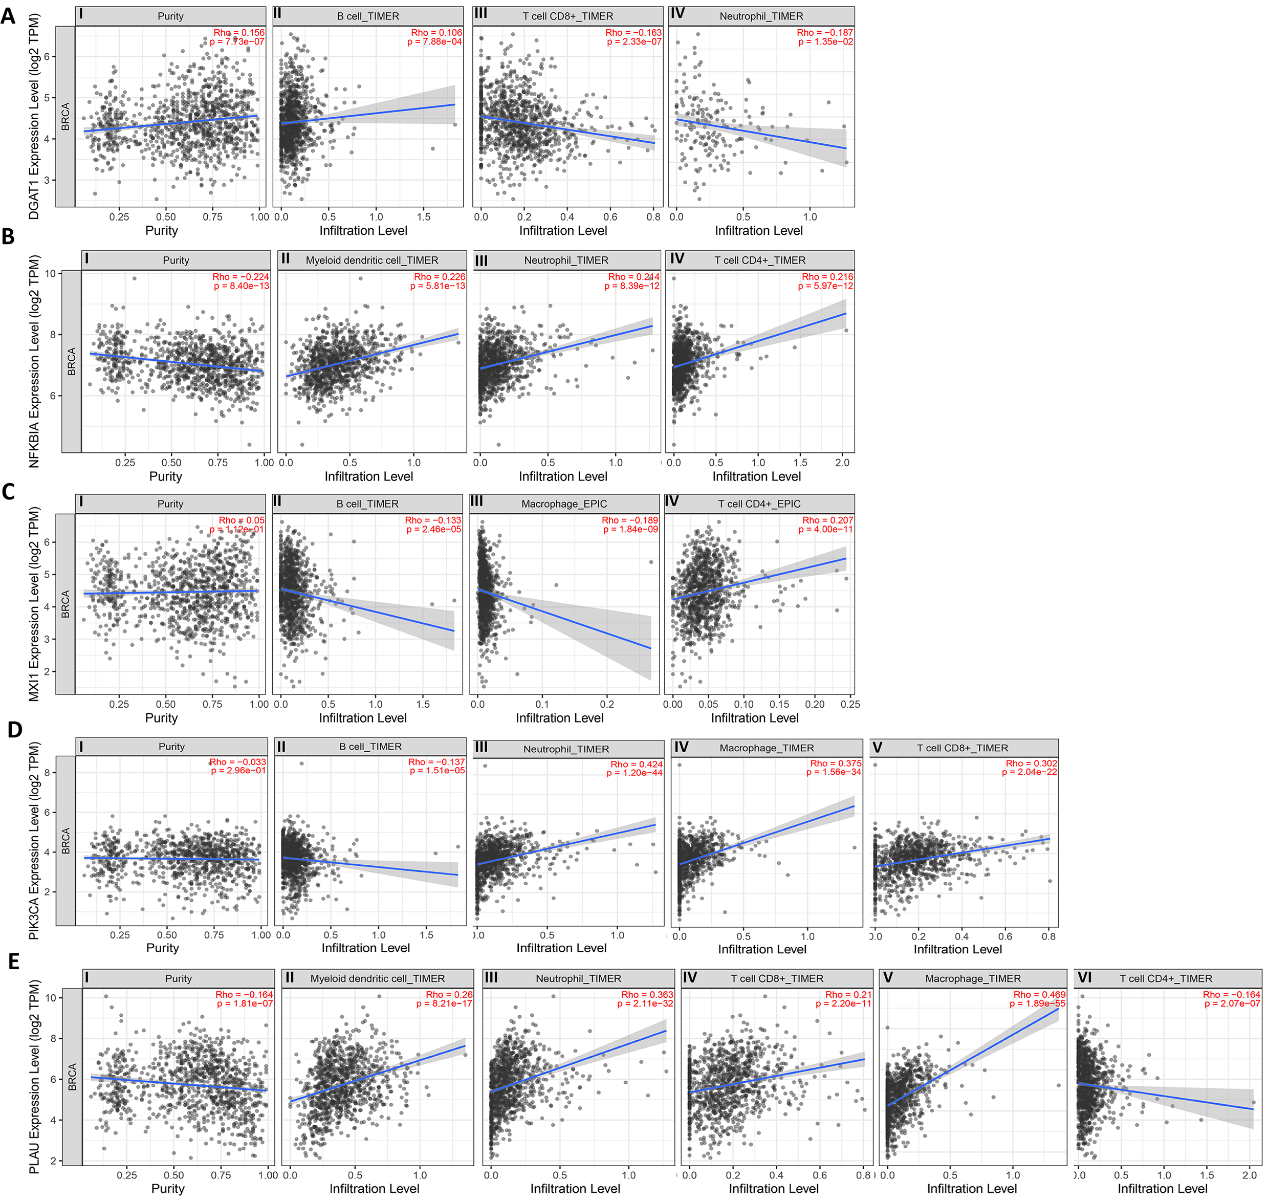


**Supplementary Figure 2:**

Correlation of microenvironment related prognostic gene’s expression level with

immune infiltration level. (A) The correlation of the DGAT1 expression level with the

purity of breast cancer [I], the infiltration level of B cell [II], CD8+ T cell [III] and

neutrophil cell [IV]. (B) The correlation of the NFKBIA expression level with the

purity of breast cancer [I], the infiltration level of myeloid dendritic cell [II],

neutrophil cell [III] and CD4+ T cell [IV]. (C) The correlation of the MXI1

expression level with the purity of breast cancer [I], the infiltration level of B cell [II],

macrophage cell [III] and CD4+ T cell [IV]. (D) The correlation of the PI3KCA

expression level with the purity of breast cancer [I], the infiltration level of B cell [II],

neutrophil cell [III], macrophage cell [IV] and CD8+ T cell [V]. (E) The correlation

of the PLAU expression level with the purity of breast cancer [I], the infiltration level

of myeloid dendritic cell [II], neutrophil cell [III], CD8+ T cell [IV], macrophage cell

[V] and CD4+ T cell [VI].
